# Supplementary material for: Analysis of a cell-free DNA–based cancer screening cohort links fragmentomic profiles, nuclease levels, and plasma DNA concentrations
Source: HighWire-hosted journal article supplement (doi:10.1101/gr.279667.124), 2024-11-27
Supplement: Supplemental_Tables_S1-S10.xlsx [file Supplemental_Tables_S1-S10.xlsx]

## Sheet: Table S1
Supplemental Table 1. Information on participants from the study cohorts. Summary of age range and plasma cfDNA concentration.
		EBV-positive cohort	EBV-negative cohort
	Number of subjects	862	497
	Age – years
	Median	54	52
	Interquartile range	49-57	46-56
	Plasma cell-free DNA conc. (ng/mL)
	Median	7.39	7.56
	Interquartile range	5.44 – 10.16	5.65 – 9.86
	Range	1.61 – 41.01	1.62 – 25.25

## Sheet: Table S2
Supplemental Table 2. List of 4-mer end motifs with a significant negative correlation to cfDNA concentration in the studied cohort (n = 862 subjects). Bonferroni’s correction was used to adjust the p-value for multiple comparisons.
	End motif	Pearson r	P-value	Adjusted P-value (Bonferroni)
	CACT	-0.33	<0.0001	<0.0001
	CATC	-0.32	<0.0001	<0.0001
	CACC	-0.29	<0.0001	<0.0001
	CTTC	-0.25	<0.0001	<0.0001
	CCTC	-0.24	<0.0001	<0.0001
	AGCC	-0.23	<0.0001	<0.0001
	TGCC	-0.23	<0.0001	<0.0001
	CCAC	-0.23	<0.0001	<0.0001
	ATCC	-0.23	<0.0001	<0.0001
	ACCC	-0.22	<0.0001	<0.0001
	CACA	-0.21	<0.0001	<0.0001
	CTCC	-0.21	<0.0001	<0.0001
	TCCC	-0.21	<0.0001	<0.0001
	AGCT	-0.2	<0.0001	<0.0001
	TGGT	-0.2	<0.0001	<0.0001
	CTCT	-0.19	<0.0001	<0.0001
	ACTC	-0.18	<0.0001	<0.0001
	CCTT	-0.18	<0.0001	<0.0001
	ACCT	-0.17	<0.0001	0.0001
	TCAC	-0.17	<0.0001	0.0001
	GTCC	-0.16	<0.0001	0.0008
	CCAT	-0.16	<0.0001	0.001
	ATCT	-0.15	<0.0001	0.0014
	CCCT	-0.15	<0.0001	0.0014
	TGAC	-0.15	<0.0001	0.0014
	TGTG	-0.15	<0.0001	0.0019
	TGCT	-0.15	<0.0001	0.0025
	AACC	-0.15	<0.0001	0.0025
	CGCC	-0.14	<0.0001	0.0083
	AGTT	-0.14	<0.0001	0.012
	TTCC	-0.13	<0.0001	0.018
	CCCC	-0.13	<0.0001	0.022
	TGCA	-0.13	<0.0001	0.024
	CCTG	-0.13	<0.0001	0.026

## Sheet: Table S3
Supplemental Table 3. List of 4-mer end motifs (45 motifs) with a significant positive correlation to cfDNA concentration in the studied cohort (n = 862 subjects). Bonferroni’s correction was used to adjust the p-value for multiple comparisons.
	End motif	Pearson r	P-value	Adjusted P-value (Bonferroni)
	GCAA	0.35	<0.0001	<0.0001
	GAAC	0.31	<0.0001	<0.0001
	GGCA	0.3	<0.0001	<0.0001
	GCCA	0.3	<0.0001	<0.0001
	GAAA	0.29	<0.0001	<0.0001
	GCAT	0.27	<0.0001	<0.0001
	GAAG	0.27	<0.0001	<0.0001
	GAGT	0.27	<0.0001	<0.0001
	GGAA	0.26	<0.0001	<0.0001
	GAGA	0.26	<0.0001	<0.0001
	GGCG	0.26	<0.0001	<0.0001
	GTGA	0.26	<0.0001	<0.0001
	GCAC	0.26	<0.0001	<0.0001
	GGCT	0.25	<0.0001	<0.0001
	GCTA	0.23	<0.0001	<0.0001
	GTCA	0.23	<0.0001	<0.0001
	GACA	0.23	<0.0001	<0.0001
	GTAG	0.23	<0.0001	<0.0001
	GTAC	0.22	<0.0001	<0.0001
	GGTA	0.22	<0.0001	<0.0001
	GTTA	0.21	<0.0001	<0.0001
	GCAG	0.21	<0.0001	<0.0001
	GTTG	0.2	<0.0001	<0.0001
	GGAC	0.19	<0.0001	<0.0001
	GAAT	0.19	<0.0001	<0.0001
	GCTG	0.19	<0.0001	<0.0001
	ACAG	0.19	<0.0001	<0.0001
	GTAA	0.18	<0.0001	<0.0001
	GTGC	0.18	<0.0001	<0.0001
	GGGA	0.18	<0.0001	<0.0001
	GGTC	0.18	<0.0001	<0.0001
	GGGT	0.18	<0.0001	<0.0001
	GCCG	0.17	<0.0001	0.0001
	GGGC	0.17	<0.0001	0.0003
	GCGA	0.16	<0.0001	0.0007
	GATA	0.16	<0.0001	0.0007
	GGAT	0.16	<0.0001	0.0009
	GATG	0.15	<0.0001	0.0014
	AAAG	0.15	<0.0001	0.003
	GCCT	0.15	<0.0001	0.0042
	TCTT	0.14	<0.0001	0.012
	GGCC	0.14	<0.0001	0.013
	GGGG	0.14	<0.0001	0.015
	ACGA	0.13	0.0001	0.027
	ATAG	0.13	0.0001	0.038

## Sheet: Table S4
Supplemental Table 4. Multiple linear regression analysis of size stratified F-profile contributions to cfDNA concentration in the studied cohort.
	Parameter estimates	Variable	Estimate	Standard error	95% CI (asymptotic)	|t|	P-value	Summary
	β0	Intercept	27.6	5.499	16.81 to 38.39	5.019	<0.0001	****
	β1	231 - 600 bp (Profile I)	-0.4825	0.09636	-0.6717 to -0.2934	5.007	<0.0001	****
	β2	231 - 600 bp (Profile III)	-0.7922	0.1836	-1.153 to -0.4319	4.316	<0.0001	****
	β3	231 - 600 bp (Profile V)	0.231	0.07365	0.08643 to 0.3755	3.136	0.0018	**
	β4	161 - 230 bp (Profile V)	-0.5442	0.239	-1.013 to -0.07516	2.277	0.023	*
	β5	21-160 bp (Profile V)	0.4554	0.2448	-0.02502 to 0.9359	1.861	0.0632	ns
	β6	161 - 230 bp (Profile I)	0.2549	0.1434	-0.02655 to 0.5364	1.778	0.0758	ns
	β7	161 - 230 bp (Profile III)	-0.1432	0.2834	-0.6995 to 0.4130	0.5053	0.6135	ns
	β8	231 - 600 bp (Profile II)	0.02259	0.09904	-0.1718 to 0.2170	0.228	0.8197	ns

## Sheet: Table S5
Supplemental Table 5. Correlation of parameters from clinical laboratory tests to plasma cfDNA concentration from the follow-up collection (n = 26 individuals). False discovery rate (FDR) adjustment was used to correct the p-value for multiple comparisons.
	Clinical test parameter	Mean (± SD)	Pearson R	Adjusted Pearson p-value
	Hematology Results
	Red blood cell (RBC, x1012/L)	4.70 (± 0.51)	0.256	0.3634
	Erythrocyte sedimentation rate (mm/hr)	17 (± 9)	0.272	0.3634
	White blood cell (WBC, x109/L)	6.4 (±1.5)	0.27	0.3634
	Neutrophil count	3.8 (±1.2)	0.254	0.3634
	Lymphocyte count	1.8 (± 0.5)	0.201	0.489
	Monocyte count	0.5 (± 0.1)	0.313	0.3387
	Eosinophil count	0.24 (± 0.16)	-0.084	0.8196
	Platelet count (x109/L)	252 (± 46)	-0.04	0.873
	Protein components
	Total proteins (g/L)	74 (± 4)	0.549	0.0296 (*)
	Albumin (g/L)	38 (± 2)	-0.157	0.6213
	IgG (g/L)	14.74 (± 4.13)	0.371	0.248
	IgA (g/L)	2.86 (± 1.36)	0.347	0.2842
	IgM (g/L)	0.90 (± 0.67)	-0.122	0.7084
	IgG + IgA + IgM (g/L)	18.57 (± 4.84)	0.42	0.195
	Haptoglobin (g/L)	0.99 (± 0.47)	-0.282	0.3634
	Alkaline phosphatase, ALP (IU/L)	70 (± 22)	0.371	0.248
	Alanine aminotransferase, ALT (IU/L)	25 (± 11)	0.676	0.0024 (**)
	C-reactive protein, CRP (mg/L)	2.3 (± 2.0)	0.595	0.0168 (*)
	Hemoglobin (g/dL)	14.2 (± 1.2)	0.15	0.6213
	Non-protein components
	Sodium (mmol/L)	140 (± 3)	-0.04	0.873
	Potassium (mmol/L)	4.1 (± 0.3)	0.061	0.873
	Bilirubin (µmol/L)	10 (± 4)	-0.102	0.873
	Urea (mmol/L)	5.7 (± 1.2)	0.307	0.3387
	Creatinine (µmol/L)	88 (± 15)	-0.223	0.4368

## Sheet: Table S6
Supplemental Table 6. Multiple linear regression analysis performed for all plasma protein components from clinical laboratory parameters from the follow-up collection (n = 26 individuals).
	Parameter estimates	Variable	Estimate	Standard error	95% CI (asymptotic)	|t|	P-value	Summary
	β0	Intercept	-16.78	38.06	-97.45 to 63.90	0.4408	0.6653	ns
	β1	ALT/GPT (IU/L)	0.4046	0.1146	0.1616 to 0.6475	3.53	0.0028	**
	β2	Plasma CRP (mg/L)	2.413	0.8188	0.6776 to 4.149	2.947	0.0095	**
	β3	IgG (g/L)	0.8885	0.7704	-0.7446 to 2.522	1.153	0.2657	ns
	β4	Albumin (g/L)	1.037	0.9121	-0.8966 to 2.971	1.137	0.2723	ns
	β5	Total ALP (IU/L)	0.0643	0.06773	-0.07929 to 0.2079	0.9493	0.3566	ns
	β6	IgA (g/L)	0.7813	1.159	-1.677 to 3.239	0.6739	0.51	ns
	β7	Total Protein (g/L)	-0.5607	0.9076	-2.485 to 1.363	0.6178	0.5454	ns
	β8	Haptoglobin (g/L)	-1.355	2.519	-6.694 to 3.984	0.5381	0.5979	ns
	β9	IgM (g/L)	0.3691	2.021	-3.914 to 4.652	0.1827	0.8574	ns

## Sheet: Table S7
Supplemental Table 7. Information of pregnancy trimester and fetal fraction deduced by SNP-based approaches for pregnancy cases.
	Trimester	Sample ID	Fetal fraction deduced by SNP-based approach (%)
	1st cohort of pregnant individuals (n = 30)
	First trimester (n=10)	M11882	7
		M11842	9.9
		M11518	13.6
		M11714	13.9
		M11570	14
		M11869	15.7
		M11987	15.8
		M11549	16.1
		M11537	17.1
		M12092	17.5
	Second trimester (n=10)	M11766	8.9
		M11752	11.1
		M11883	13.1
		M11909	14.9
		M11797	15.2
		M11805	16.4
		M12041	17
		M11653	20.4
		M11758	22.3
		M11701	34.3
	Third trimester (n=10)	M11912	21
		M11993	22.1
		M11910	27
		M11973	29.3
		M11915	33
		M11991	36
		M11999	36.5
		M11918	36.8
		M11911	39.5
		M11976	46.8
	2nd cohort of pregnant individuals (n = 30)
	First trimester (n=30)	M13487	5.9
		M13400	6
		M13382	6.6
		M13386	6.7
		M13448	7
		M13395	7.1
		M13401	7.8
		M13402	8.3
		M13399	8.5
		M13369	8.6
		M13368	8.7
		M13451	9.2
		M13444	10.3
		M13478	11.8
		M13452	12
		M13384	12.2
		M13460	12.4
		M13450	12.9
		M13397	13.1
		M13488	14.1
		M13463	15.8
		M13477	16.1
		M13476	17.6
		M13443	17.7
		M13371	18.7
		M13462	19
		M13367	19.6
		M13461	21.9
		M13398	22.2

## Sheet: Table S8
Supplemental Table 8. Barcelona Clinic Liver Cancer (BCLC) staging information and estimated tumor fraction by ichorCNA for all individuals with HCC.
	BCLC stage of HCC	Sample ID	Tumor DNA fraction estimated by ichorCNA (%)
	1st cohort of patients with HCC (n = 20)
	Early stage (n = 8)	TBR1015	3.4
		TBR2038	3.6
		TBR1662	4.4
		TBR1388	4.6
		TBR2080	5.9
		TBR1899	6.4
		TBR1850	6.5
		TBR1644	13.9
	Intermediate stage (n = 5)	TBR1555	5.7
		TBR874	8.5
		TBR858	9.8
		TBR964	19.3
		TBR852	20.9
	Advanced stage (n = 7)	TBR853	20.4
		TBR1757	22.6
		TBR2083	22.7
		TBR2000	26.3
		TBR1838	31.1
		TBR855	42
		TBR1861	43.4
	2nd cohort of patients with HCC (n = 20)
	Early stage (n = 6)	TBR5077	7
		TBR5792	7.5
		TBR4664	9.2
		TBR3284	31.3
		TBR6405	40.1
		TBR5142	44.6
	Intermediate stage (n = 8)	TBR4896	8.1
		TBR4632	8.2
		TBR3000	13
		TBR4680	14.6
		TBR4888	16.8
		TBR3186	18.2
		TBR4512	23.8
		TBR5013	45.7
	Advanced stage (n = 6)	TBR4779	8.8
		TBR4871	12.7
		TBR4656	20.3
		TBR5658	37.5
		TBR5733	52.5
		TBR5278	66.3

## Sheet: Table S9
Supplemental Table 9. Features with the highest coefficient value in the prediction of fetal fraction using LASSO regression.
	Feature type	Feature	Coefficient
	Motif	ACGT	581.56
	Motif	CCGA	502.53
	Motif	CCGT	342.96
	Size	136-bp	30.98
	Motif	TGCA	24.18
	Size	155-bp	3.59
	Size	137-bp	3.36

## Sheet: Table S10
Supplemental Table 10. Features with the highest coefficient value in the prediction the tumor fraction using LASSO regression.
	Feature type	Feature	Coefficient
	Motif	ACGA	1385.87
	Motif	TTAT	20.21
	Motif	CAGA	9.09
	Motif	CAGC	4.82
	Size	155 bp	0.68
